# Supplementary material for: SERS aptasensor detection of Salmonella typhimurium using a magnetic gold nanoparticle and gold nanoparticle based sandwich structure
Source: Royal Society of Chemistry journal article supplement (doi:10.1039/c6ay02623k), 2016-01-01
Supplement: c6ay02623k1.pdf [file c6ay02623k1.pdf]

## Supporting information

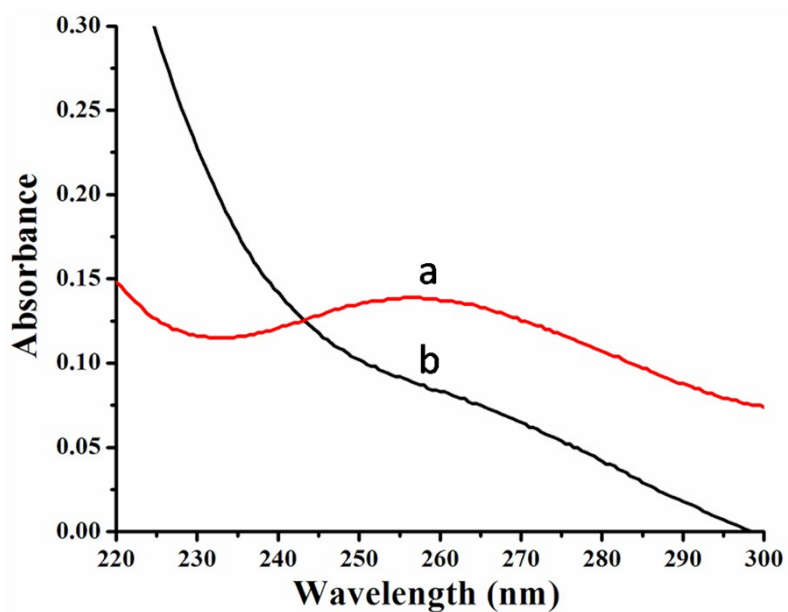

**Fig. S1** UV-visible absorbance spectra of thiolation aptamer solution before (a) and after (b) the combination with MGNPs
